# Supplementary material for: ChIP-seq and In Vivo Transcriptome Analyses of the Aspergillus fumigatus SREBP SrbA Reveals a New Regulator of the Fungal Hypoxia Response and Virulence
Source: PLoS Pathog. 2014 Nov 6;10(11):e1004487. doi: 10.1371/journal.ppat.1004487 (PMC4223079; doi:10.1371/journal.ppat.1004487)
Supplement: Table S1 — Summary of ChIP-seq next generation sequencing data for each respective sample. (XLSX) [file ppat.1004487.s005.xlsx]

## Sheet: Table S1
Sample	1Condition	Sequenced Paired Reads	Passed Quality Control	Aligned Concordant Pairs for Peak Calling
4 hour hypoxia rep1	ChIP	2573266	2234248	1213064
4 hour hypoxia rep1	IC	17594328	15537347	1221415
4 hour hypoxia rep2	ChIP	1855411	1800354	1555747
4 hour hypoxia rep2	IC	2382668	1989494	1885123
12 hour hypoxia	ChIP	1648503	976830	223210
12 hour hypoxia	IC	1452125	1041777	239271
combined samples	ChIP	-	-	2992021
combined samples2	IC	-	-	2978825
1ChIP = Chromatin ImmunoPrecipitated Samples, IC = Input Control
2 3345809 IC reads were subsampled to approximate number of reads in ChIP sample.
